# Supplementary material for: Mapping Species Distributions with MAXENT Using a Geographically Biased Sample of Presence Data: A Performance Assessment of Methods for Correcting Sampling Bias
Source: PLOS journal article supplement (doi:10.1371/journal.pone.0097122), 2014-05-12

**Figure S1:** Correlations between measures of correction performance. Lower panel: correlation scatterplots, upper panel: Pearson's correlation coefficient  $r$  and associated p-value.

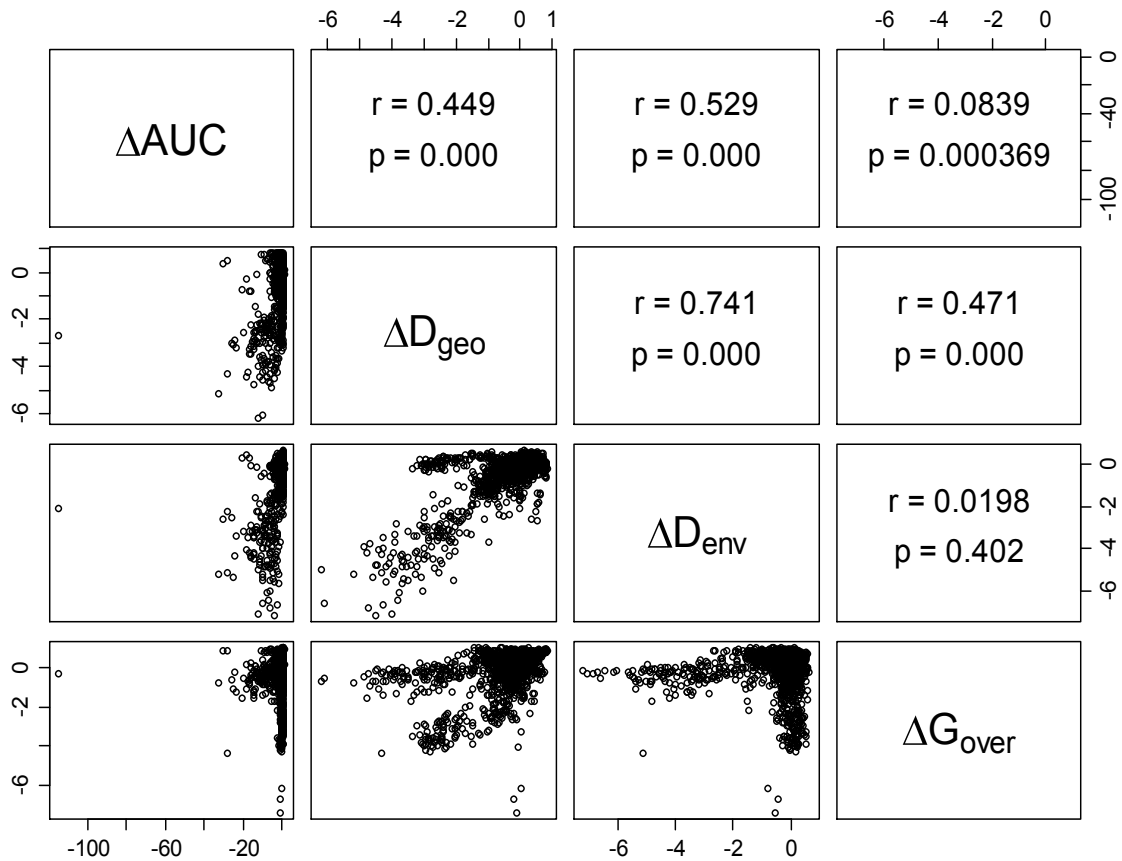

Supplement: S1 (10.1371/journal.pone.0097122.s001) [file journal.pone.0097122.s001]
